# Supplementary material for: Stabilizing an amorphous V2O5/carbon nanotube paper electrode with conformal TiO2 coating by atomic layer deposition for lithium ion batteries
Source: Royal Society of Chemistry journal article supplement (doi:10.1039/c5ta01949d), 2015-10-14
Supplement: c5ta01949d1.pdf [file c5ta01949d1.pdf]

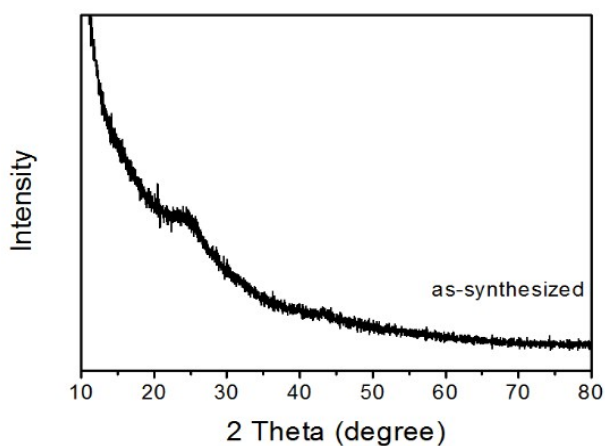

Figure S1 XRD pattern of  $V_2O_5$ -CNT

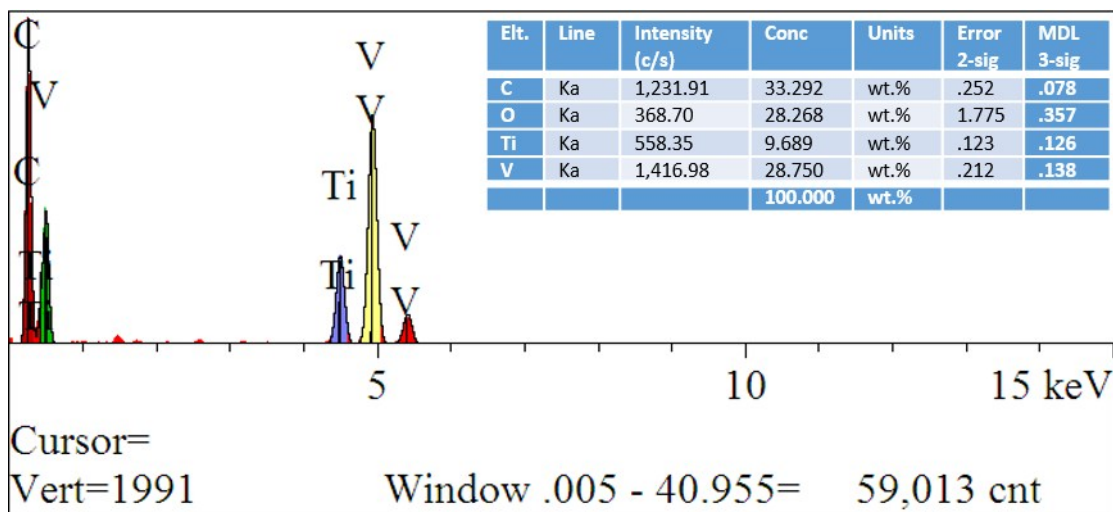

Figure S2 EDS of  $TiO_2$ - $V_2O_5$ -CNT

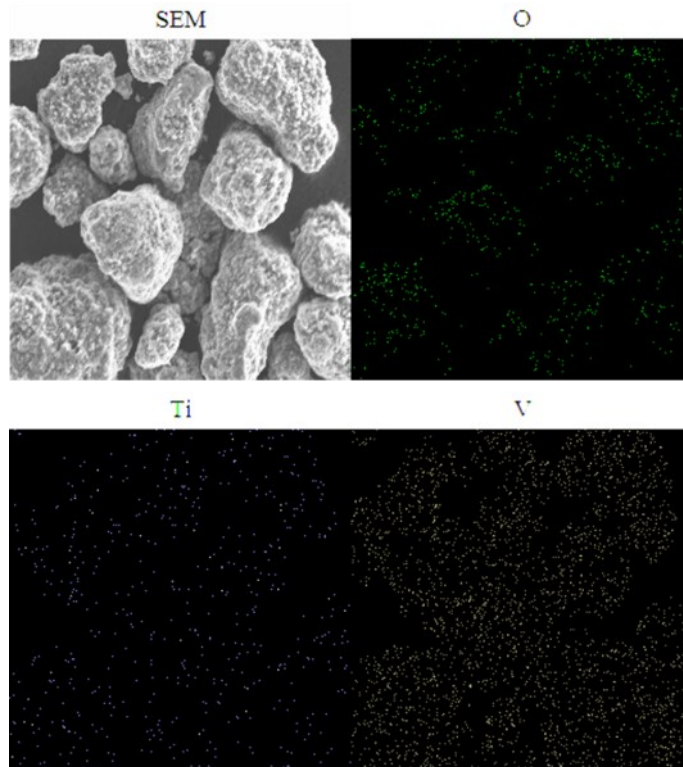

Figure S3 Elemental mapping of  $\text{TiO}_2\text{-V}_2\text{O}_5\text{-CNT}$

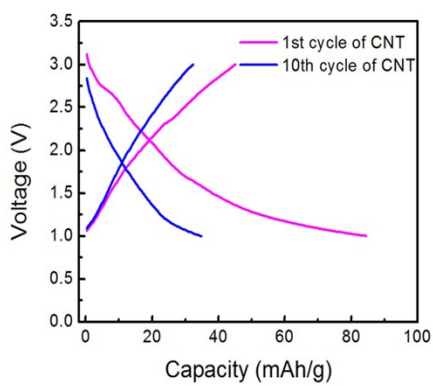

Voltage profile of CNT

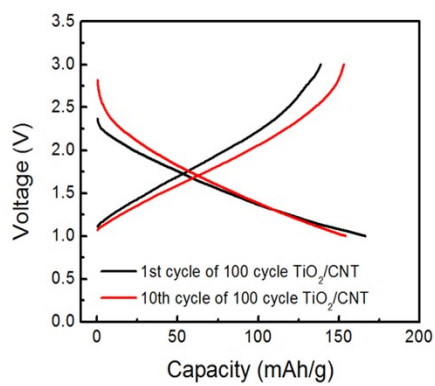

Voltage profile of 100 cycle  $\text{TiO}_2/\text{CNT}$

Figure S4 Voltage profile of CNT and  $\text{TiO}_2/\text{CNT}$
